# Supplementary material
Source: Royal Society of Chemistry journal article supplement (doi:10.1039/d6qi00635c)
Supplement: d6qi00635c1.pdf [file d6qi00635c1.pdf]

Electronic Supporting Information

# **Polymerization-Enhanced Optical Anisotropy in Selenites: A Trimeric [H<sub>2</sub>Se<sub>3</sub>O<sub>7</sub>] Motif Delivering Large UV Birefringence**

Xize Zhan,<sup>1</sup> Gangji Yi,<sup>1</sup> Xuan Zou,<sup>1</sup> Gen Li,<sup>1</sup> Lu Liu,<sup>1</sup> Jiarong Lv,<sup>1</sup> Hongmei Zeng,<sup>1</sup> Zhien Lin,<sup>1,\*</sup>  
and Guohong Zou<sup>1,\*</sup>

<sup>1</sup> College of Chemistry, Sichuan University, Chengdu 610065, P. R. China.

\* Corresponding authors (E-mails: zhienlin@scu.edu.cn; zough@scu.edu.cn)

## Table of Contents

| Sections          | Titles                                                                                                                                                                                                                                                                                                                        | Pages |
|-------------------|-------------------------------------------------------------------------------------------------------------------------------------------------------------------------------------------------------------------------------------------------------------------------------------------------------------------------------|-------|
| <b>Section S1</b> | Experimental section (Instrumentations and Computational Descriptions).                                                                                                                                                                                                                                                       | S3-S4 |
| <b>Table S1</b>   | Crystal data and structure refinement for CsCl(H <sub>2</sub> SeO <sub>3</sub> ) <sub>2</sub> and (CsCl) <sub>2</sub> (H <sub>2</sub> SeO <sub>3</sub> )(H <sub>2</sub> Se <sub>3</sub> O <sub>7</sub> )                                                                                                                      | S5    |
| <b>Table S2</b>   | Fractional Atomic Coordinates ( $\times 10^4$ ) and Equivalent Isotropic Displacement Parameters ( $\text{\AA}^2 \times 10^3$ ) for CsCl(H <sub>2</sub> SeO <sub>3</sub> ) <sub>2</sub> .                                                                                                                                     | S6    |
| <b>Table S3</b>   | Fractional Atomic Coordinates ( $\times 10^4$ ) and Equivalent Isotropic Displacement Parameters ( $\text{\AA}^2 \times 10^3$ ) for (CsCl) <sub>2</sub> (H <sub>2</sub> SeO <sub>3</sub> )(H <sub>2</sub> Se <sub>3</sub> O <sub>7</sub> ).                                                                                   | S6    |
| <b>Table S4</b>   | Bond lengths [ $\text{\AA}$ ] and angles [ $^\circ$ ] for CsCl(H <sub>2</sub> SeO <sub>3</sub> ) <sub>2</sub> .                                                                                                                                                                                                               | S7    |
| <b>Table S5</b>   | Bond lengths [ $\text{\AA}$ ] and angles [ $^\circ$ ] for (CsCl) <sub>2</sub> (H <sub>2</sub> SeO <sub>3</sub> )(H <sub>2</sub> Se <sub>3</sub> O <sub>7</sub> ).                                                                                                                                                             | S7    |
| <b>Table S6</b>   | Calculation of the density ( $\rho_s$ ) of [SeO <sub>3</sub> ] <sup>2-</sup> per unit cell for CsCl(H <sub>2</sub> SeO <sub>3</sub> ) <sub>2</sub> and (CsCl) <sub>2</sub> (H <sub>2</sub> SeO <sub>3</sub> )(H <sub>2</sub> Se <sub>3</sub> O <sub>7</sub> ).                                                                | S8    |
| <b>Table S7</b>   | The quantity, density, and SCALPs-to-minimum-optical-axis angle ( $\theta$ ) of the [H <sub>2</sub> Se <sub>3</sub> O <sub>7</sub> ] trimer and [H <sub>2</sub> SeO <sub>3</sub> ] monomer, and their contribution in (CsCl) <sub>2</sub> (H <sub>2</sub> SeO <sub>3</sub> )(H <sub>2</sub> Se <sub>3</sub> O <sub>7</sub> ). | S8    |
| <b>Table S8</b>   | Space group, band gap and birefringence of most polymerized selenites.                                                                                                                                                                                                                                                        | S8    |
| <b>Figure S1</b>  | The calculated and experimental XRD patterns of CsCl(H <sub>2</sub> SeO <sub>3</sub> ) <sub>2</sub> and (CsCl) <sub>2</sub> (H <sub>2</sub> SeO <sub>3</sub> )(H <sub>2</sub> Se <sub>3</sub> O <sub>7</sub> ).                                                                                                               | S9    |
| <b>Figure S2</b>  | The TGA curve of (CsCl) <sub>2</sub> (H <sub>2</sub> SeO <sub>3</sub> )(H <sub>2</sub> Se <sub>3</sub> O <sub>7</sub> ).                                                                                                                                                                                                      | S9    |
| <b>Figure S3</b>  | The IR spectrum of (CsCl) <sub>2</sub> (H <sub>2</sub> SeO <sub>3</sub> )(H <sub>2</sub> Se <sub>3</sub> O <sub>7</sub> ).                                                                                                                                                                                                    | S10   |
| <b>Figure S4</b>  | The UV-vis diffuse reflectance spectrum (a) and the bandgap (b) of (CsCl) <sub>2</sub> (H <sub>2</sub> SeO <sub>3</sub> )(H <sub>2</sub> Se <sub>3</sub> O <sub>7</sub> ).                                                                                                                                                    | S10   |
| <b>Figure S5</b>  | The arrangement of [H <sub>2</sub> SeO <sub>3</sub> ] units along the <i>a</i> -axis (a) and the arrangement of [H <sub>2</sub> Se <sub>3</sub> O <sub>7</sub> ] trimers along the <i>c</i> -axis in (CsCl) <sub>2</sub> (H <sub>2</sub> SeO <sub>3</sub> )(H <sub>2</sub> Se <sub>3</sub> O <sub>7</sub> ).                  | S11   |
| <b>Figure S6</b>  | Comparison of the contributions to the birefringence ( $\rho \times \cos\theta$ ) from the monomer [H <sub>2</sub> SeO <sub>3</sub> ] and the trimer [H <sub>2</sub> Se <sub>3</sub> O <sub>7</sub> ] in (CsCl) <sub>2</sub> (H <sub>2</sub> SeO <sub>3</sub> )(H <sub>2</sub> Se <sub>3</sub> O <sub>7</sub> ).              | S11   |
| <b>Figure S7</b>  | The HOMO-LUMO of CsCl(H <sub>2</sub> SeO <sub>3</sub> ) <sub>2</sub> .                                                                                                                                                                                                                                                        | S11   |
| <b>References</b> |                                                                                                                                                                                                                                                                                                                               | S12   |

## Section S1. Experimental section

**Structure determination and refinement.** Suitable single crystals were selected under an optical microscope. Single-crystal X-ray diffraction data for  $(\text{CsCl})_2(\text{H}_2\text{SeO}_3)(\text{H}_2\text{Se}_3\text{O}_7)$  were collected at room temperature using a Rigaku XtaLAB diffractometer with graphite monochromatic Mo-K $\alpha$  ( $\lambda = 0.71073 \text{ \AA}$ ). The crystal structure was solved with the SHELXTL program package.<sup>1</sup> The atomic coordinates and anisotropic thermal parameters are refined by least-squares plane convergence based on the complete matrix of moments of  $F^2$ . Structural analysis was performed with the ADDSYM algorithm from the PLATON software, confirming no additional symmetries.<sup>2</sup>

**Characterization of the Powder Sample.** Powder X-ray diffraction (PXRD) analysis of the title compound was performed on a Shimadzu XRD-6100 system equipped with a monochromatic Cu-K $\alpha$  source ( $\lambda = 1.5418 \text{ \AA}$ , 40 kV/30 mA). The angle range of  $2\theta$  is  $5\text{-}50^\circ$ , with a scanning step width of  $0.05^\circ$  and a scanning time of 0.2 s.

**Thermal Behavior Analysis.** Thermogravimetric analysis (TGA) was conducted utilizing a Netzsch STA 409 PC in a flowing  $\text{N}_2$  atmosphere, with a heating rate of  $10^\circ\text{C}/\text{min}$  and a temperature range of  $30\text{-}800^\circ\text{C}$ . An empty  $\text{Al}_2\text{O}_3$  crucible was employed as the reference material.

**Infrared and UV-Vis Diffuse Reflectance Spectrum.** Infrared spectrum was collected using a Vertex 70 Fourier Transform Infrared (FT-IR) spectrometer with a spectral range of  $4000\text{-}400 \text{ cm}^{-1}$ . KBr was used as a reference material. The crystals were thoroughly mixed and ground with KBr in an agate mortar, and then pressed into clear tablets approximately 1 mm thick and 10 mm in diameter using a specialized tablet press for testing. The UV-visible diffuse reflectance spectrum was recorded in the  $200\text{-}800 \text{ nm}$  range at room temperature using a Shimadzu UV-2600 spectrophotometer with  $\text{BaSO}_4$  plates as standard (100% reflectance).

**Theoretical Calculations.** To investigate the band structure and optical properties of the title compounds, density functional theory (DFT)<sup>3</sup> calculations were performed.

To obtain the linear optical properties, the complex dielectric function

$$\varepsilon(\omega) = \varepsilon_1(\omega) + i\varepsilon_2(\omega)$$

has been determined in the random phase approximation from the PBE wavefunctions. The imaginary part of the dielectric function due to direct inter-band transitions is given by the expression,

$$\varepsilon_2(\hbar\omega) = \frac{2e^2\pi}{\Omega\varepsilon_0} \sum_{k,v,c} \left| \langle \psi_k^c | u \cdot r | \psi_k^v \rangle \right|^2 \delta(E_k^c - E_k^v - E)$$

where  $\Omega$ ,  $\omega$ ,  $u$ ,  $v$  and  $c$  are the unit-cell volume, photon frequencies, the vector defining the polarization of the incident electric field, valence and conduction bands, respectively. The real part of the dielectric function is obtained from  $\varepsilon_2$  by a Kramers-Kronig transformation,

$$\varepsilon_1(\omega) = 1 + \frac{2}{\pi} \int_0^{+\infty} d\omega' \frac{\omega'^2 \varepsilon_2(\omega')}{\omega'^2 - \omega^2}$$

To ensure energy convergence, a cutoff energy of 750 eV was applied. For  $(\text{CsCl})_2(\text{H}_2\text{SeO}_3)(\text{H}_2\text{Se}_3\text{O}_7)$ , a Monkhorst-Pack k-point grid of  $4 \times 4 \times 3$  was used in the Brillouin zone, while a  $6 \times 6 \times 5$  grid was employed for  $\text{CsCl}(\text{H}_2\text{SeO}_3)_2$ .<sup>4-5</sup> The relevant analyses were performed using Multiwfn for the calculation of polarizability anisotropy.<sup>6</sup>

**Table S1.** Crystal data and structure refinement for CsCl(H<sub>2</sub>SeO<sub>3</sub>)<sub>2</sub> and (CsCl)<sub>2</sub>(H<sub>2</sub>SeO<sub>3</sub>)(H<sub>2</sub>Se<sub>3</sub>O<sub>7</sub>).

| Formula                                                                                                         | CsCl(H <sub>2</sub> SeO <sub>3</sub> ) <sub>2</sub>             | (CsCl) <sub>2</sub> (H <sub>2</sub> SeO <sub>3</sub> )(H <sub>2</sub> Se <sub>3</sub> O <sub>7</sub> ) |
|-----------------------------------------------------------------------------------------------------------------|-----------------------------------------------------------------|--------------------------------------------------------------------------------------------------------|
| Formula weight                                                                                                  | 426.31                                                          | 408.3                                                                                                  |
| Temperature(K)                                                                                                  | 293(2)                                                          | 298.34(10)                                                                                             |
| Crystal system                                                                                                  | triclinic                                                       | triclinic                                                                                              |
| Space group                                                                                                     | <i>P</i> $\bar{1}$                                              | <i>P</i> $\bar{1}$                                                                                     |
| <i>a</i> (Å)                                                                                                    | 5.3224(2)                                                       | 8.4541(8)                                                                                              |
| <i>b</i> (Å)                                                                                                    | 6.4994(3)                                                       | 9.9920(5)                                                                                              |
| <i>c</i> (Å)                                                                                                    | 6.7116(3)                                                       | 10.4237(11)                                                                                            |
| $\alpha$ (deg)                                                                                                  | 70.800(4)                                                       | 73.076(7)                                                                                              |
| $\beta$ (deg)                                                                                                   | 88.917(3)                                                       | 70.505(9)                                                                                              |
| $\gamma$ (deg)                                                                                                  | 79.738(4)                                                       | 67.811(7)                                                                                              |
| <i>V</i> (Å <sup>3</sup> )                                                                                      | 215.552(17)                                                     | 754.71(13)                                                                                             |
| <i>Z</i>                                                                                                        | 1                                                               | 4                                                                                                      |
| $\rho_{\text{calcd}}$ (g/cm <sup>3</sup> )                                                                      | 3.284                                                           | 3.593                                                                                                  |
| $\mu$ (mm <sup>-1</sup> )                                                                                       | 13.025                                                          | 14.862                                                                                                 |
| <i>F</i> (000)                                                                                                  | 192.0                                                           | 728.0                                                                                                  |
| Goodness-of-fit on <i>F</i> <sup>2</sup>                                                                        | 1.020                                                           | 0.994                                                                                                  |
| Final <i>R</i> indices ( <i>I</i> > 2σ( <i>I</i> )) <sup>a</sup> <i>R</i> <sub>1</sub> / <i>wR</i> <sub>2</sub> | <i>R</i> <sub>1</sub> = 0.0290, <i>wR</i> <sub>2</sub> = 0.0753 | <i>R</i> <sub>1</sub> = 0.0354, <i>wR</i> <sub>2</sub> = 0.0748                                        |

$$^a R_1(F) = \sum ||F_o| - |F_c|| / \sum |F_o|; wR_2(F_o^2) = [\sum w(F_o^2 - F_c^2)^2 / \sum w(F_o^2)^2]^{1/2}.$$

**Table S2.** Fractional Atomic Coordinates ( $\times 10^4$ ) and Equivalent Isotropic Displacement Parameters ( $\text{\AA}^2 \times 10^3$ ) for  $\text{CsCl}(\text{H}_2\text{SeO}_3)_2$ .  $U_{\text{eq}}$  is defined as 1/3 of the trace of the orthogonalised  $U_{ij}$  tensor.

| Atom | <i>x</i>  | <i>y</i>  | <i>z</i>  | U(eq)     |
|------|-----------|-----------|-----------|-----------|
| Cs1  | 10000     | 10000     | 5000      | 33.5(2)   |
| Se1  | 5726.1(8) | 6906.4(7) | 1686.0(6) | 26.56(19) |
| Cl1  | 10000     | 10000     | 0         | 29.0(3)   |
| O1   | 3959(5)   | 4869(5)   | 2341(4)   | 33.3(7)   |
| O2   | 8652(6)   | 5058(5)   | 2344(5)   | 40.0(8)   |
| O3   | 5444(6)   | 7837(5)   | 3750(4)   | 34.2(7)   |
| H1   | 4718.08   | 3790.59   | 3284.86   | 50        |
| H2   | 9760(120) | 5870(100) | 1940(90)  | 60        |

**Table S3.** Fractional Atomic Coordinates ( $\times 10^4$ ) and Equivalent Isotropic Displacement Parameters ( $\text{\AA}^2 \times 10^3$ ) for  $(\text{CsCl})_2(\text{H}_2\text{SeO}_3)(\text{H}_2\text{Se}_3\text{O}_7)$ .  $U_{\text{eq}}$  is defined as 1/3 of the trace of the orthogonalised  $U_{ij}$  tensor.

| Atom | <i>x</i>    | <i>y</i>   | <i>z</i>    | U(eq)     |
|------|-------------|------------|-------------|-----------|
| Cs1  | 3808.7(4)   | 4720.3(4)  | 3222.2(4)   | 25.76(12) |
| Cs2  | 2908.3(5)   | 9184.6(4)  | 4151.5(4)   | 29.39(12) |
| Se1  | 924.3(7)    | 6088.6(6)  | 6937.0(6)   | 20.48(14) |
| Se2  | -919.2(6)   | 8497.4(5)  | 2384.0(6)   | 18.22(14) |
| Se3  | 2050.9(6)   | 7555.5(5)  | -269.4(6)   | 16.39(13) |
| Se4  | 5570.1(6)   | 7793.2(5)  | 27.5(6)     | 18.26(14) |
| Cl1  | -1845.8(17) | 9597.0(14) | 9326.5(16)  | 26.6(3)   |
| Cl2  | 4220.1(18)  | 8840.9(15) | -2904.2(16) | 28.5(3)   |
| O1   | 93(5)       | 8002(4)    | 6872(5)     | 31.7(10)  |
| O2   | -389(6)     | 6064(6)    | 5972(6)     | 34.8(11)  |
| O3   | 2821(5)     | 5994(4)    | 5817(4)     | 27.9(9)   |
| O4   | -245(5)     | 8216(5)    | 3763(4)     | 30.6(10)  |
| O5   | -2321(5)    | 7421(4)    | 3039(4)     | 24.8(9)   |
| O6   | 856(5)      | 7068(4)    | 1497(4)     | 27.1(9)   |
| O7   | 2179(5)     | 6177(4)    | -867(4)     | 26.3(9)   |
| O8   | 4107(5)     | 6764(4)    | 216(4)      | 24.6(9)   |
| O9   | 5623(5)     | 7380(4)    | 1650(5)     | 28.6(9)   |
| O10  | 7427(5)     | 6484(4)    | -720(5)     | 28.2(9)   |
| H1   | -2828       | 7515       | 2455        | 37        |
| H2   | 263         | 8181       | 7685        | 48        |
| H3   | 2070(60)    | 5440(30)   | -250(20)    | 40        |
| H4   | -200        | 6490       | 5300        | 80(40)    |

**Table S4.** Selected bond lengths [Å] and angles [°] for CsCl(H<sub>2</sub>SeO<sub>3</sub>)<sub>2</sub>.

|                 |           |                 |            |
|-----------------|-----------|-----------------|------------|
| Se(1)-O(3)      | 1.679(3)  | Se(1)-O(1)      | 1.696(3)   |
| Se(1)-O(2)      | 1.751(3)  | O(3)-Se(1)-O(1) | 103.36(14) |
| O(1)-Se(1)-O(2) | 94.16(14) | O(3)-Se(1)-O(2) | 101.01(16) |

**Table S5.** Selected bond lengths [Å] and angles [°] for (CsCl)<sub>2</sub>(H<sub>2</sub>SeO<sub>3</sub>)(H<sub>2</sub>Se<sub>3</sub>O<sub>7</sub>).

|                  |           |                  |           |
|------------------|-----------|------------------|-----------|
| Se(3)-O(6)       | 1.624(3)  | Se(1)-O(3)       | 1.626(4)  |
| Se(4)-O(8)       | 1.819(3)  | Se(2)-O(5)       | 1.739     |
| Se(4)-O(10)      | 1.734(4)  | Se(3)-O(8)       | 1.794(3)  |
| Se(4)-O(9)       | 1.632(4)  | Se(3)-O(6)       | 1.804(4)  |
| Se(2)-O(6)       | 1.836(4)  | Se(1)-O(2)       | 1.740(4)  |
| Se(2)-O(4)       | 1.630(4)  | Se(1)-O(1)       | 1.759(4)  |
| Se(2)-Se(1)-O(1) | 95.5(2)   | O(3)-Se(1)-O(2)  | 103.3(2)  |
| O(3)-Se(1)-O(1)  | 99.20(19) | O(4)-Se(2)-O(5)  | 98.9(2)   |
| O(4)-Se(2)-O(6)  | 99.9(2)   | Se(3)-O(6)-Se(2) | 120.0(2)  |
| O(9)-Se(4)-O(8)  | 96.75(18) | O(10)-Se(4)-O(8) | 93.02(17) |
| O(7)-Se(3)-O(8)  | 97.42(19) | Se(3)-O(8)-Se(4) | 124.2(2)  |
| O(8)-Se(3)-O(6)  | 90.99(19) | O(7)-Se(3)-O(6)  | 98.9(19)  |
| O(9)-Se(4)-O(10) | 103.2(2)  | O(5)-Se(2)-O(6)  | 92.38(18) |

**Table S6.** Calculation of the density ( $\rho_s$ ) of  $[\text{SeO}_3]^{2-}$  atoms per unit cell for  $\text{CsCl}(\text{H}_2\text{SeO}_3)_2$  and  $(\text{CsCl})_2(\text{H}_2\text{SeO}_3)(\text{H}_2\text{Se}_3\text{O}_7)$ .

| Compounds                                                                  | $n_s$ | V ( $\text{\AA}^3$ ) | $\rho_s$ |
|----------------------------------------------------------------------------|-------|----------------------|----------|
| $\text{CsCl}(\text{H}_2\text{SeO}_3)_2$                                    | 2     | 215.55               | 0.0093   |
| $(\text{CsCl})_2(\text{H}_2\text{SeO}_3)(\text{H}_2\text{Se}_3\text{O}_7)$ | 8     | 754.7                | 0.0106   |

**Table S7.** The quantity, density, and SCALPs-to-minimum-optical-axis angle ( $\theta$ ) of the  $[\text{H}_2\text{Se}_3\text{O}_7]$  trimer and  $[\text{H}_2\text{SeO}_3]$  monomer, and their contribution in  $(\text{CsCl})_2(\text{H}_2\text{SeO}_3)(\text{H}_2\text{Se}_3\text{O}_7)$ .

| Groups                              | n | $\rho$  | $\cos\theta$ | $\rho*\cos\theta$ | Contribution |
|-------------------------------------|---|---------|--------------|-------------------|--------------|
| $[\text{H}_2\text{Se}_3\text{O}_7]$ | 3 | 0.00397 | 0.802        | 0.00318           | 73.6%        |
| $[\text{H}_2\text{SeO}_3]$          | 2 | 0.00265 | 0.431        | 0.00114           | 26.4%        |

**Table S8.** Space group, band gap and birefringence of most polymerized selenites.

| Compounds                                                                                                | Space group                  | Eg(eV)     | Birefringence       |
|----------------------------------------------------------------------------------------------------------|------------------------------|------------|---------------------|
| $\text{CsGa}_3(\text{SeO}_3)_2(\text{Se}_2\text{O}_5)_3$                                                 | $P\bar{6}2c$                 | 3.8        | 0.025@532nm         |
| $\text{CsAl}_3(\text{SeO}_3)_2(\text{Se}_2\text{O}_5)_3$                                                 | $P\bar{6}2c$                 | 2.66       | 0.035@532nm         |
| $\text{CsIn}_3(\text{SeO}_3)_2(\text{Se}_2\text{O}_5)_3$                                                 | $P\bar{6}2c$                 | 3.37       | 0.038@532nm         |
| $\text{Ga}_2(\text{Se}_2\text{O}_5)_2(\text{HSeO}_3)(\text{H}_2\text{SeO}_3)\text{F}$                    | $Pna2_1$                     | 4.71       | 0.051@532nm         |
| $\text{Ga}(\text{Se}_2\text{O}_5)(\text{HSeO}_3)$                                                        | $P2_1/c$                     | 4.34       | 0.108@532nm         |
| $\text{Gd}(\text{NO}_3)(\text{Se}_2\text{O}_5)\cdot 3\text{H}_2\text{O}$                                 | $P2_12_12_1$                 | 5.53       | 0.109@1064nm        |
| <b><math>(\text{CsCl})_2(\text{H}_2\text{SeO}_3)(\text{H}_2\text{Se}_3\text{O}_7)</math> (This work)</b> | <b><math>P\bar{1}</math></b> | <b>4.2</b> | <b>0.188@546 nm</b> |

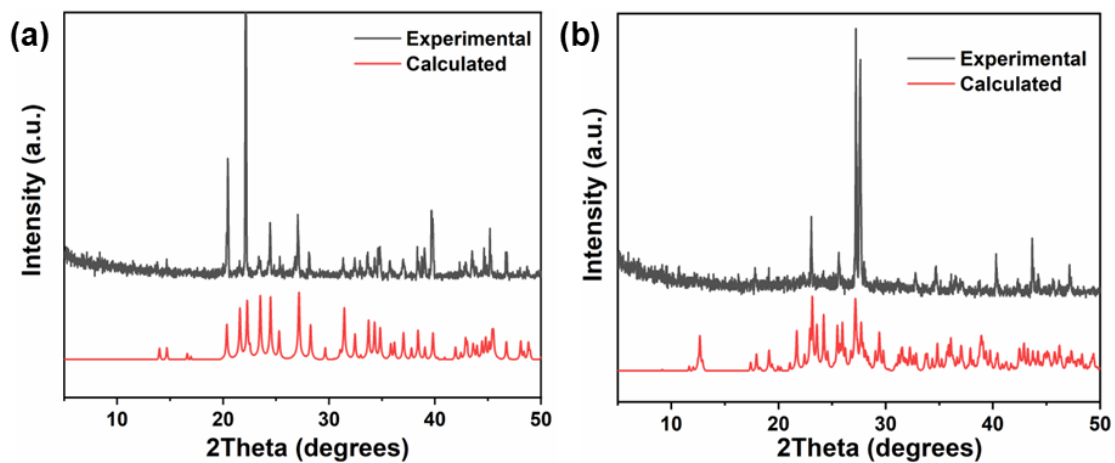

**Figure S1.** The calculated and experimental XRD patterns of  $\text{CsCl}(\text{H}_2\text{SeO}_3)_2$  (a) and  $(\text{CsCl})_2(\text{H}_2\text{SeO}_3)(\text{H}_2\text{Se}_3\text{O}_7)$  (b).

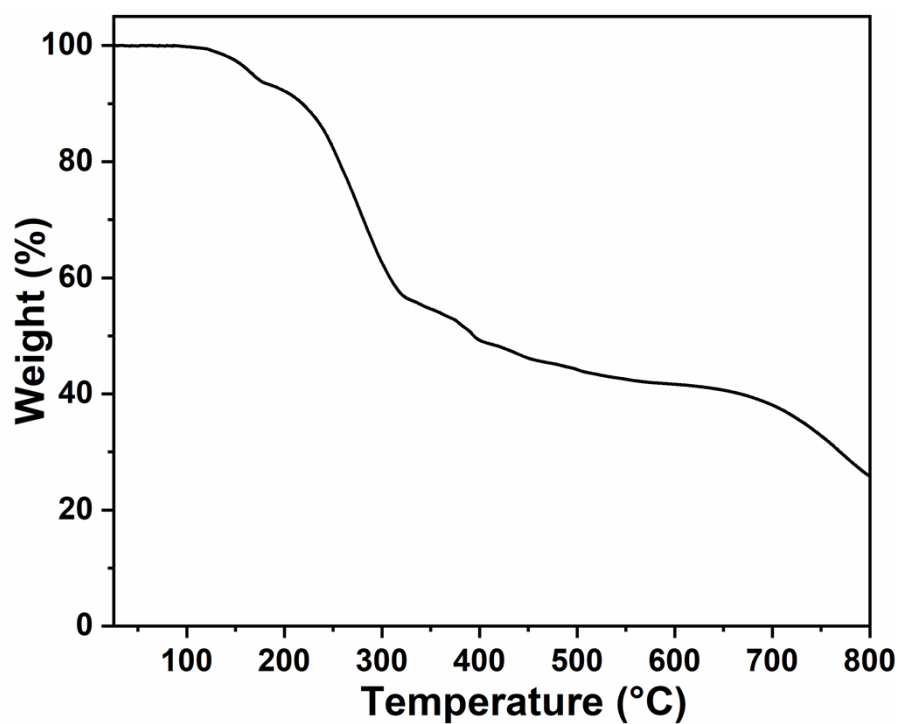

**Figure S2.** The TGA curve of  $(\text{CsCl})_2(\text{H}_2\text{SeO}_3)(\text{H}_2\text{Se}_3\text{O}_7)$ .

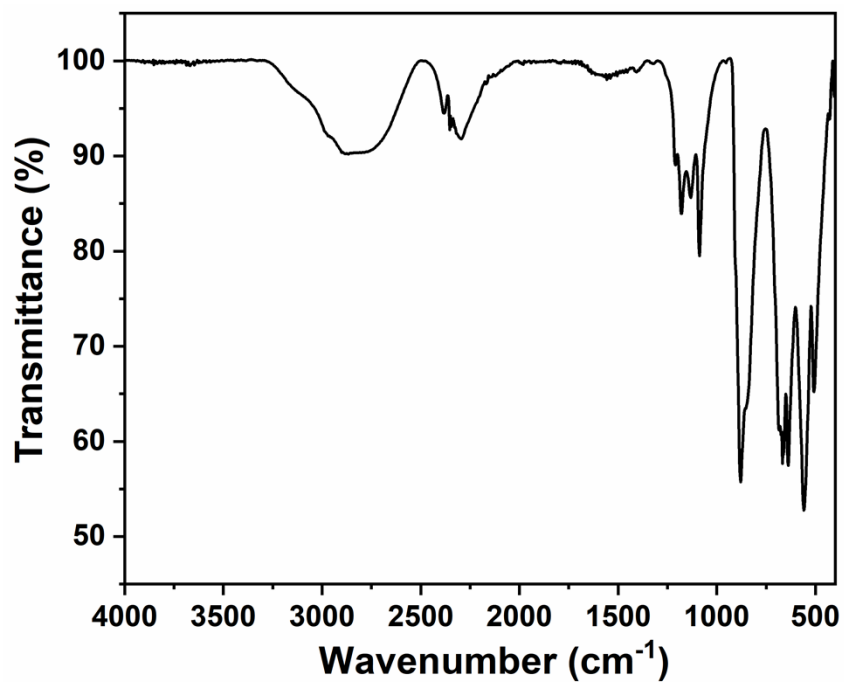

Figure S3. The IR spectrum of  $(\text{CsCl})_2(\text{H}_2\text{SeO}_3)(\text{H}_2\text{Se}_3\text{O}_7)$ .

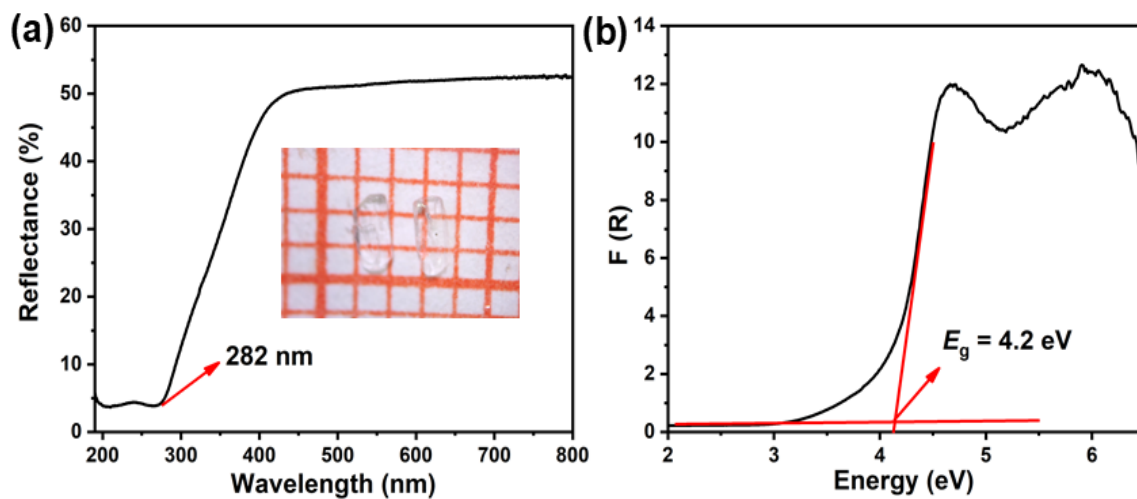

Figure S4. The UV-vis diffuse reflectance spectrum (a) and the bandgap (b) of  $(\text{CsCl})_2(\text{H}_2\text{SeO}_3)(\text{H}_2\text{Se}_3\text{O}_7)$ . The embedded image shows the single crystals photograph of  $(\text{CsCl})_2(\text{H}_2\text{SeO}_3)(\text{H}_2\text{Se}_3\text{O}_7)$  (scale bar: 1 mm).

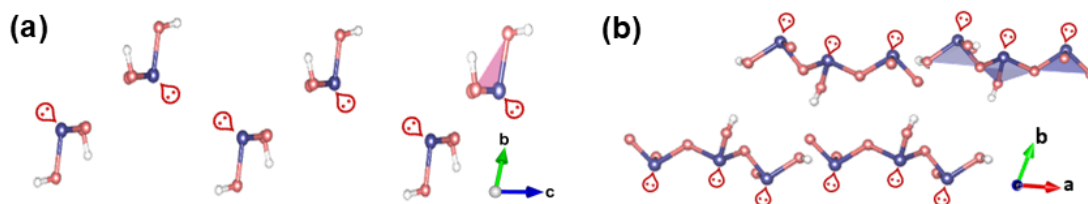

**Figure S5.** The arrangement of  $[\text{H}_2\text{SeO}_3]$  units along the  $a$ -axis (a) and the arrangement of  $[\text{H}_2\text{Se}_3\text{O}_7]$  trimers along the  $c$ -axis in  $(\text{CsCl})_2(\text{H}_2\text{SeO}_3)(\text{H}_2\text{Se}_3\text{O}_7)$ .

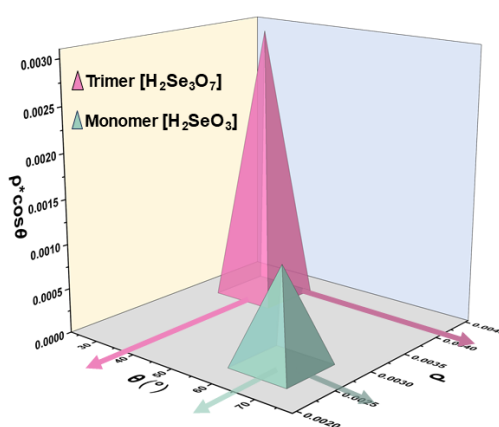

**Figure S6.** Comparison of the contributions to the birefringence ( $\rho \times \cos\theta$ ) from the monomer  $[\text{H}_2\text{SeO}_3]$  and the trimer  $[\text{H}_2\text{Se}_3\text{O}_7]$  in  $(\text{CsCl})_2(\text{H}_2\text{SeO}_3)(\text{H}_2\text{Se}_3\text{O}_7)$ .  $\rho$  represents the density of the respective selenite monomer or trimer within the unit cell, and  $\theta$  is the angle between the SCALPs of the selenite groups and the optical axis.

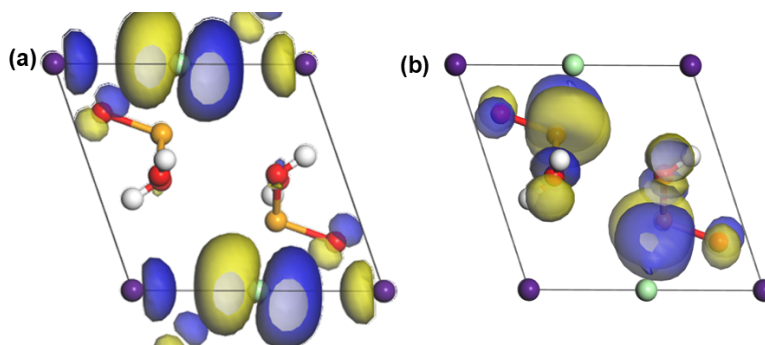

**Figure S7.** The HOMO-LUMO of  $\text{CsCl}(\text{H}_2\text{SeO}_3)_2$ .

## References

- (1) Sheldrick, G. M. A short history of SHELX. *Foundations of crystallography* **2008**, *64* (1), 112-122.
- (2) Spek, A. Single-crystal structure validation with the program PLATON. *Applied Crystallography* **2003**, *36* (1), 7-13.
- (3) Segall, M. D.; Philip, J. D. L.; Probert, M. J.; Pickard, C. J.; Hasnip, P. J.; Clark, S. J.; Payne, M. C. First-principles simulation: ideas, illustrations and the CASTEP code. *J. Phys.: Condens. Matter.* **2002**, *14* (11), 2717.
- (4) Nicholls, R. J.; Morris, A. J.; Pickard, C. J.; Yates, J. R., OptaDOS - a new tool for EELS calculations. *J. Phys. Conf. Ser.* **2012**, *371* (1), 012062.
- (5) Morris, A. J.; Nicholls, R. J.; Pickard, C. J.; Yates, J. R., OptaDOS: A tool for obtaining density of states, core-level and optical spectra from electronic structure codes. *Comput. Phys. Commun.* **2014**, *185* (5), 1477-1485.
- (6) Lu, T.; Chen, F. Multiwfn: A multifunctional wavefunction analyzer. *Journal of computational chemistry* **2012**, *33* (5), 580-592.
